# Supplementary material for: Health system interventions to integrate genetic testing in routine oncology services: A systematic review
Source: PubMed Central journal article supplement (PMC8133413; doi:10.1371/journal.pone.0250379), 2021-05-19
Supplement: pone.0250379.s001.pdf [file pone.0250379.s001.pdf]

**S1 Table. Search Strategy Medline, Embase, PsychINFO (Ovid) up to 26.05.20\***

| #  | Searches                                                                                                                                                                                                                                                                                                                                 | Results |
|----|------------------------------------------------------------------------------------------------------------------------------------------------------------------------------------------------------------------------------------------------------------------------------------------------------------------------------------------|---------|
| 1  | (lynch* adj3 syndrome).tw.                                                                                                                                                                                                                                                                                                               | 6998    |
| 2  | ((lynch* adj3 famil*) and (cancer* or neoplasm*)).tw.                                                                                                                                                                                                                                                                                    | 916     |
| 3  | (Hereditary Nonpolyp* Colorectal Cancer or Hereditary Non-polyp* Colorectal Cancer).tw.                                                                                                                                                                                                                                                  | 5441    |
| 4  | HNPCC.tw.                                                                                                                                                                                                                                                                                                                                | 5046    |
| 5  | (((hereditary or inherit*) adj3 (colon* or colorectal* or ovar* or endometrial or endometrium or uterine or uterus)) and (cancer* or neoplasm*)).tw.                                                                                                                                                                                     | 12689   |
| 6  | (((hereditary adj3 (nonpolyp* or non-polyp*)) and (colon* or colorectal*)).tw.                                                                                                                                                                                                                                                           | 6921    |
| 7  | (((hereditary adj3 (cancer* or neoplasm*)) and (colon* or colorectal* or ovar* or endometrial or endometrium or endometrioid or uterine or uterus)).tw.                                                                                                                                                                                  | 9290    |
| 8  | ((Famil* adj3 (Nonpolyp* or Non-polyp*)) and (colon* or colorectal*)).tw.                                                                                                                                                                                                                                                                | 515     |
| 9  | (famil* adj3 (colon* or colorectal* or ovar* or endometrial or endometrium or endometrioid or uterine or uterus)).tw.                                                                                                                                                                                                                    | 11327   |
| 10 | exp Colorectal Neoplasms, Hereditary Nonpolyposis/ or exp Ovarian Neoplasms/ or exp Ovary cancer/ or exp Ovary carcinoma/ or exp Endometrial Neoplasms/ or exp Endometrium cancer/ or exp Endometrioid carcinoma/ or exp Endometrium carcinoma/ or (exp Neoplasms/ and (exp Gastrointestinal disorders/ or exp Ovaries/ or exp Uterus/)) | 718392  |
| 11 | (((microsatellite or micro-satellite) adj3 instabilit*) or (msi adj3 test*) or ((mismatch or mis-match) adj1 repair) or (mnr adj3 test*)) and (colon* or colorectal* or lynch* or ovar* or endometrial or endometrium or endometrioid or uterine or uterus)).tw.                                                                         | 18336   |
| 12 | ((amsterdam or bethesda) adj1 criteri*).tw.                                                                                                                                                                                                                                                                                              | 1438    |

|    |                                                                                                                                                                                                                                                                                                                                                                                                                          |       |
|----|--------------------------------------------------------------------------------------------------------------------------------------------------------------------------------------------------------------------------------------------------------------------------------------------------------------------------------------------------------------------------------------------------------------------------|-------|
| 13 | ((EPCAM* or (MLH1 or hMLH1 or MSH2 or hMSH2 or MSH6 or hMSH6 or PMS2 or hPMS2)) and (colon* or colorectal* or lynch* or ovar* or endometrial or endometrium or endometrioid or uterine or uterus)).tw.                                                                                                                                                                                                                   | 12045 |
| 14 | (exp Genetic Predisposition to Disease/ and (exp colorectal cancer/ or exp Ovarian Neoplasms/ or exp Ovary cancer/ or exp Ovary carcinoma/ or exp Endometrial Neoplasms/ or exp Endometrium cancer/ or exp Endometrioid carcinoma/ or exp Endometrium carcinoma/)) or ((exp predisposition/ or exp genetics/ or exp "susceptibility (disorders)"/) and (exp gastrointestinal disorders/ or exp Ovaries/ or exp Uterus/)) | 20716 |
| 15 | exp Adenomatous Polyposis Coli/                                                                                                                                                                                                                                                                                                                                                                                          | 13582 |
| 16 | (gardner syndrome or adenomatous polyp*).tw.                                                                                                                                                                                                                                                                                                                                                                             | 22822 |
| 17 | Genes, APC/ and (colon* or colorectal*).tw.                                                                                                                                                                                                                                                                                                                                                                              | 8264  |
| 18 | ((MUTYH* or MYH*) and (colon* or colorectal*)).tw.                                                                                                                                                                                                                                                                                                                                                                       | 1399  |
| 19 | ((AFAP or FAP) and (colon* or colorectal*)).tw.                                                                                                                                                                                                                                                                                                                                                                          | 3867  |
| 20 | Hamartoma Syndrome, Multiple/                                                                                                                                                                                                                                                                                                                                                                                            | 2264  |
| 21 | (Hamartoma adj3 (syndrome or cancer* or neoplas* or colon* or colorectal* or ovar* or endometrial or endometrium or endometrioid or uterine or uterus)).tw.                                                                                                                                                                                                                                                              | 1096  |
| 22 | ((Bannayan-Riley-Ruvalcaba* or Cowden* or peutz-jegher* or peutz jegher* or juvenile polyp*) adj3 (syndrome or disease)).tw.                                                                                                                                                                                                                                                                                             | 6884  |
| 23 | ((STK11 or SMAD4 or BMPR1A) and (colon* or colorectal*)).tw.                                                                                                                                                                                                                                                                                                                                                             | 1695  |
| 24 | (PTEN and (colon or colorectal or ovar* or endometrial or endometrium or endometrioid or uterine or uterus)).tw.                                                                                                                                                                                                                                                                                                         | 5728  |
| 25 | Peutz-Jeghers Syndrome/                                                                                                                                                                                                                                                                                                                                                                                                  | 5267  |
| 26 | Colonic Polyps/ or colon disorders/                                                                                                                                                                                                                                                                                                                                                                                      | 16248 |
| 27 | (exp Genes, BRCA1/ or exp BRCA1 Protein/ or exp Genes, BRCA2/ or exp BRCA2 Protein/) and (exp Ovarian Neoplasms/ or exp Ovary cancer/ or exp Ovary carcinoma/)                                                                                                                                                                                                                                                           | 11165 |

|    |                                                                                                                                                                         |         |
|----|-------------------------------------------------------------------------------------------------------------------------------------------------------------------------|---------|
| 28 | (exp BRCA2 Protein/ or exp Genes, BRCA2/ or exp Genes, BRCA1/ or exp BRCA1 Protein/) and ovar*.tw.                                                                      | 12047   |
| 29 | ((Hereditary breast adj2 ovar* cancer*) or ((breast cancer adj3 gene*) and ovar*)).tw. or "Hereditary Breast and Ovarian Cancer Syndrome"/                              | 4931    |
| 30 | ((HBOC or BRCA*) and ovar*).tw.                                                                                                                                         | 14909   |
| 31 | 1 or 2 or 3 or 4 or 5 or 6 or 7 or 8 or 9 or 10 or 11 or 12 or 13 or 14 or 15 or 16 or 17 or 18 or 19 or 20 or 21 or 22 or 23 or 24 or 25 or 26 or 27 or 28 or 29 or 30 | 788386  |
| 32 | GENOMICS/ or genetics/ or genome/                                                                                                                                       | 935627  |
| 33 | Genetic Testing/                                                                                                                                                        | 75284   |
| 34 | Genetic disorders/ and (exp gastrointestinal disorders/ or exp Ovaries/ or exp Uterus/)                                                                                 | 223     |
| 35 | Genetic Counseling/                                                                                                                                                     | 43865   |
| 36 | genetic counsel*.tw.                                                                                                                                                    | 41430   |
| 37 | ((gene or genetic or genom* or multigene or multi-gene or genotyp*) adj3 (test* or panel*)).tw.                                                                         | 122058  |
| 38 | ((universal adj3 tumo?r) and screening).tw.                                                                                                                             | 90      |
| 39 | ((germline* or germ-line*) adj3 test*).tw.                                                                                                                              | 2026    |
| 40 | Genetic Services/                                                                                                                                                       | 1304    |
| 41 | Genetic Carrier Screening/ or (Health screening/ and Genetic testing/)                                                                                                  | 15276   |
| 42 | 32 or 33 or 34 or 35 or 36 or 37 or 38 or 39 or 40 or 41                                                                                                                | 1144592 |
| 43 | Health Plan Implementation/                                                                                                                                             | 96213   |
| 44 | (implementation\$ or disseminat\$ or knowledge translation).tw.                                                                                                         | 813919  |

|    |                                                                                                                                                                                                              |         |
|----|--------------------------------------------------------------------------------------------------------------------------------------------------------------------------------------------------------------|---------|
| 45 | Translational Medical Research/ or "research and development"/                                                                                                                                               | 215310  |
| 46 | (knowledge transfer or rollout\$ or roll-out\$ or treatment plan\$ or care plan\$ or innovation* or complex intervention or mainstream* or (pathway* adj3 (management or clinical or care or referral))).tw. | 375861  |
| 47 | "Delivery of Health Care"/ or Health Care Delivery/                                                                                                                                                          | 260881  |
| 48 | (health care servic* or health care utili?ation).tw.                                                                                                                                                         | 57898   |
| 49 | Hospitals, Public/ or Public Health Services/ or exp Health Care Services/                                                                                                                                   | 154226  |
| 50 | Health Services Research/                                                                                                                                                                                    | 66667   |
| 51 | (clinical service* or hospital program*).tw.                                                                                                                                                                 | 15598   |
| 52 | ((facilitat* or challenge* or enabl* or change agent) adj3 health).tw.                                                                                                                                       | 48511   |
| 53 | (organi?ation* adj2 (chang* or intervention* or modif*)).tw.                                                                                                                                                 | 22306   |
| 54 | (system* adj2 (chang* or intervention* or modif*)).tw.                                                                                                                                                       | 69167   |
| 55 | ((practi?e* or practi?ing) adj2 chang*).tw.                                                                                                                                                                  | 29852   |
| 56 | ((program* adj2 (chang* or intervention* or modif* or introduc* or evaluat*)) or (test adj3 (uptake or access*))).tw.                                                                                        | 124664  |
| 57 | "Referral and Consultation"/ or professional referral/ or professional consultation/                                                                                                                         | 146727  |
| 58 | Organizational Innovation/ or innovation/                                                                                                                                                                    | 149738  |
| 59 | "Delivery of Health Care, Integrated"/ or Health Care Utilization/                                                                                                                                           | 134420  |
| 60 | (scal* up or referral*).tw.                                                                                                                                                                                  | 308273  |
| 61 | 43 or 44 or 45 or 46 or 47 or 48 or 49 or 50 or 51 or 52 or 53 or 54 or 55 or 56 or 57 or 58 or 59 or 60                                                                                                     | 2671233 |

|    |                                |         |
|----|--------------------------------|---------|
| 62 | 31 and 42 and 61               | 2184    |
| 63 | remove duplicates from 62      | 1653    |
| 64 | limit 63 to english language   | 1589    |
| 65 | limit 64 to yr="1980 -Current" | 1574    |
| 66 | animals/ not humans/           | 5791706 |
| 67 | 65 not 66                      | 1566    |
