# Supplementary material for: Health system interventions to integrate genetic testing in routine oncology services: A systematic review
Source: PubMed Central journal article supplement (PMC8133413; doi:10.1371/journal.pone.0250379), 2021-05-19
Supplement: pone.0250379.s002.pdf [file pone.0250379.s002.pdf]

**S2 Table. Search strategy CINAHL (EBSCO) up to 26.05.20\***

| Search ID | Search                                                                                                                                                                           | Results |
|-----------|----------------------------------------------------------------------------------------------------------------------------------------------------------------------------------|---------|
| S1        | TI (lynch* N3 syndrome) or AB (lynch* N3 syndrome)                                                                                                                               | 532     |
| S2        | TI ((lynch* N3 famil*) and (cancer* or neoplasm*)) or AB ((lynch* N3 famil*) and (cancer* or neoplasm*))                                                                         | 59      |
| S3        | TI (Hereditary Nonpolyp* Colorectal Cancer or Hereditary Non-polyp* Colorectal Cancer) or AB (Hereditary Nonpolyp* Colorectal Cancer or Hereditary Non-polyp* Colorectal Cancer) | 207     |
| S4        | TI (HNPCC) or AB (HNPCC)                                                                                                                                                         | 138     |

|     |                                                                                                                                                                                                                                                                                                                                                                                                                                                                                                                    |        |
|-----|--------------------------------------------------------------------------------------------------------------------------------------------------------------------------------------------------------------------------------------------------------------------------------------------------------------------------------------------------------------------------------------------------------------------------------------------------------------------------------------------------------------------|--------|
| S5  | TI (((hereditary or inherit*) N3 (colon* or colorectal* or ovar* or endometrial or endometrium or uterine or uterus)) and (cancer* or neoplasm*)) or AB (((hereditary or inherit*) N3 (colon* or colorectal* ovar* or endometrial or endometrium or uterine or uterus)) and (cancer* or neoplasm*))                                                                                                                                                                                                                | 445    |
| S6  | TI ((hereditary N3 (nonpolyp* or non-polyp*)) and (colon* or colorectal*)) or AB ((hereditary N3 (nonpolyp* or non-polyp*)) and (colon* or colorectal*))                                                                                                                                                                                                                                                                                                                                                           | 248    |
| S7  | TI ((hereditary N3 (cancer* or neoplasm*)) and (colon* or colorectal* or ovar* or endometrial or endometrium or endometrioid or uterine or uterus)) or AB ((hereditary N3 (cancer* or neoplasm*)) and (colon* or colorectal* or ovar* or endometrial or endometrium or endometrioid or uterine or uterus))                                                                                                                                                                                                         | 813    |
| S8  | TI ((Famil* N3 (Nonpolyp* or Non-polyp*)) and (colon* or colorectal*)) or AB ((Famil* N3 (Nonpolyp* or Non-polyp*)) and (colon* or colorectal*))                                                                                                                                                                                                                                                                                                                                                                   | 29     |
| S9  | TI (famil* N3 (colon* or colorectal* or ovar* or endometrial or endometrium or endometrioid or uterine or uterus)) or AB (famil* N3 (colon* or colorectal* or ovar* or endometrial or endometrium or endometrioid or uterine or uterus))                                                                                                                                                                                                                                                                           | 736    |
| S10 | (MH "Colorectal Neoplasms, Hereditary Nonpolyposis+") OR (MH "Ovarian Neoplasms+") OR (MH "Endometrial Neoplasms")                                                                                                                                                                                                                                                                                                                                                                                                 | 14,260 |
| S11 | TI (((microsatellite or micro-satellite) N3 instabilit*) or (msi N3 test*) or ((mismatch or mis-match) N1 repair) or (mmr N3 test*)) and (colon* or colorectal* or lynch* or ovar* or endometrial or endometrium or endometrioid or uterine or uterus)) or AB (((microsatellite or micro-satellite) N3 instabilit*) or (msi N3 test*) or ((mismatch or mis-match) N1 repair) or (mmr N3 test*)) and (colon* or colorectal* or lynch* or ovar* or endometrial or endometrium or endometrioid or uterine or uterus)) | 855    |
| S12 | TI ((amsterdam or bethesda) N1 criteri*) or AB ((amsterdam or bethesda) N1 criteri*)                                                                                                                                                                                                                                                                                                                                                                                                                               | 71     |
| S13 | TI ((EPCAM* or (MLH1 or hMLH1 or MSH2 or hMSH2 or MSH6 or hMSH6 or PMS2 or hPMS2)) and (colon* or colorectal* or lynch* or ovar* or endometrial or endometrium or endometrioid or uterine or uterus)) or AB ((EPCAM* or (MLH1 or hMLH1 or MSH2 or hMSH2 or                                                                                                                                                                                                                                                         | 386    |

|     |                                                                                                                                                                                                                                                                                                                      |     |
|-----|----------------------------------------------------------------------------------------------------------------------------------------------------------------------------------------------------------------------------------------------------------------------------------------------------------------------|-----|
|     | MSH6 or hMSH6 or PMS2 or hPMS2)) and (colon* or colorectal* or lynch* or ovar* or endometrial or endometrium or endometrioid or uterine or uterus))                                                                                                                                                                  |     |
| S14 | (((MH "Disease Susceptibility") OR (MH "Rare Diseases")) AND ((MH "Intestinal Neoplasms+") OR (MH "Ovarian Neoplasms+") OR (MH "Endometrial Neoplasms"))                                                                                                                                                             | 766 |
| S15 | (MH "Adenomatous Polyps+")                                                                                                                                                                                                                                                                                           | 866 |
| S16 | TI (gardner syndrome or adenomatous polyp*) or AB (gardner syndrome or adenomatous polyp*)                                                                                                                                                                                                                           | 874 |
| S17 | ((MH "Genes, Neoplasm+") AND ((MH "Intestinal Neoplasms+") OR (MH "Ovarian Neoplasms+") OR (MH "Endometrial Neoplasms")))                                                                                                                                                                                            | 64  |
| S18 | TI ((MUTYH* or MYH*) and (colon* or colorectal*)) or AB ((MUTYH* or MYH*) and (colon* or colorectal*))                                                                                                                                                                                                               | 53  |
| S19 | TI ((AFAP or FAP) and (colon* or colorectal*)) or AB ((AFAP or FAP) and (colon* or colorectal*))                                                                                                                                                                                                                     | 112 |
| S20 | (MH "Hamartoma Syndrome, Multiple+")                                                                                                                                                                                                                                                                                 | 147 |
| S21 | TI (Hamartoma N3 (syndrome or cancer* or neoplas* or colon* or colorectal* or ovar* or endometrial or endometrium or endometrioid or uterine or uterus)) or AB (Hamartoma N3 (syndrome or cancer* or neoplas* or colon* or colorectal* or ovar* or endometrial or endometrium or endometrioid or uterine or uterus)) | 86  |
| S22 | TI ((Bannayan-Riley-Ruvalcaba* or Cowden* or peutz-jegher* or peutz jegher* or juvenile polyp*) N3 (syndrome or disease)) or AB ((Bannayan-Riley-Ruvalcaba* or Cowden* or peutz-jegher* or peutz jegher* or juvenile polyp*) N3 (syndrome or disease))                                                               | 332 |
| S23 | TI ((STK11 or SMAD4 or BMPR1A) and (colon* or colorectal*)) or AB ((STK11 or SMAD4 or BMPR1A) and (colon* or colorectal*))                                                                                                                                                                                           | 47  |

|     |                                                                                                                                                                                                                                     |         |
|-----|-------------------------------------------------------------------------------------------------------------------------------------------------------------------------------------------------------------------------------------|---------|
| S24 | TI (PTEN and (colon or colorectal or ovar* or endometrial or endometrium or endometrioid or uterine or uterus)) or AB (PTEN* and (colon or colorectal or ovar* or endometrial or endometrium or endometrioid or uterine or uterus)) | 206     |
| S25 | ((MH "Genes, BRCA") AND (MH "Ovarian Neoplasms+"))                                                                                                                                                                                  | 628     |
| S26 | TI ((MH "Genes, BRCA") AND (ovar*)) OR AB ((MH "Genes, BRCA") AND (ovar*))                                                                                                                                                          | 541     |
| S27 | TI (Hereditary breast N2 ovar* cancer*) OR AB (Hereditary breast N2 ovar* cancer*)                                                                                                                                                  | 342     |
| S28 | TI ((breast cancer N3 gene*) and (ovar*)) OR AB ((breast cancer N3 gene*) and (ovar*))                                                                                                                                              | 308     |
| S29 | TI ((HBOC or BRCA*) and (ovar*)) OR AB ((HBOC or BRCA*) and (ovar*))                                                                                                                                                                | 1034    |
| S30 | (MH "Peutz-Jeghers Syndrome")                                                                                                                                                                                                       | 182     |
| S31 | (MH "Colonic Polyps")                                                                                                                                                                                                               | 1550    |
| S32 | (MH "Genetics+") OR (MH "Genetic Counseling")                                                                                                                                                                                       | 147,487 |
| S33 | TI (genetic counsel*) or AB (genetic counsel*)                                                                                                                                                                                      | 3,202   |
| S34 | TI ((gene or genetic or genom* or multigene or multi-gene or genotyp*) N3 (test* or panel*)) or AB ((gene or genetic or genom* or multigene or multi-gene or genotyp*) N3 (test* or panel*))                                        | 9661    |
| S35 | TI ((universal N3 (tumour or tumor)) and screening) or AB ((universal N3 (tumour or tumor)) and screening)                                                                                                                          | 12      |
| S36 | TI ((germline* or germ-line*) N3 test*) or AB ((germline* or germ-line*) N3 test*)                                                                                                                                                  | 161     |

|     |                                                                                                                                                                                                                                                                                                                                                                                                                      |         |
|-----|----------------------------------------------------------------------------------------------------------------------------------------------------------------------------------------------------------------------------------------------------------------------------------------------------------------------------------------------------------------------------------------------------------------------|---------|
| S37 | ((MH "Evaluation Research+") OR (MH "Program Development+"))                                                                                                                                                                                                                                                                                                                                                         | 160,592 |
| S38 | TI (implementation* or disseminat* or knowledge translation) or AB (implementation* or disseminat* or knowledge translation)                                                                                                                                                                                                                                                                                         | 95,483  |
| S39 | TI (knowledge transfer or rollout* or roll-out* or treatment plan* or care plan* or innovation* or complex intervention or mainstream*) or AB (knowledge transfer or rollout* or roll-out* or treatment plan* or care plan* or innovation* or complex intervention or mainstream*) or TI (pathway* N3 (management or clinical or care or referral)) or AB (pathway* N3 (management or clinical or care or referral)) | 68,087  |
| S40 | (MH "Health Care Delivery+")                                                                                                                                                                                                                                                                                                                                                                                         | 277,631 |
| S41 | TI (health care servic* or health care utili?ation) or AB (health care servic* or health care utili?ation)                                                                                                                                                                                                                                                                                                           | 25,161  |
| S42 | (MH "Hospitals, Public+")                                                                                                                                                                                                                                                                                                                                                                                            | 13,031  |
| S43 | (MH "Health Services Research+")                                                                                                                                                                                                                                                                                                                                                                                     | 20,336  |
| S44 | TI (clinical service* or hospital program*) or AB (clinical service* or hospital program*)                                                                                                                                                                                                                                                                                                                           | 14,479  |
| S45 | TI ((facilitat* or challenge* or enabl* or change agent) N3 health) or AB ((facilitat* or challenge* or enabl* or change agent) N3 health)                                                                                                                                                                                                                                                                           | 14,207  |
| S46 | TI (organi?ation* N2 (chang* or intervention* or modif*)) or AB (organi?ation* N2 (chang* or intervention* or modif*))                                                                                                                                                                                                                                                                                               | 4272    |
| S47 | TI (system* N2 (chang* or intervention* or modif*)) or AB (system* N2 (chang* or intervention* or modif*))                                                                                                                                                                                                                                                                                                           | 9820    |
| S48 | TI ((practi?e* or practi?ing) N2 chang*) or AB ((practi?e* or practi?ing) N2 chang*)                                                                                                                                                                                                                                                                                                                                 | 9737    |

|     |                                                                                                                                                                                                               |         |
|-----|---------------------------------------------------------------------------------------------------------------------------------------------------------------------------------------------------------------|---------|
| S49 | TI (program* N2 (chang* or intervention* or modif*or introduc*)) or AB (program* N2 (chang* or intervention* or modif* or introduc*)) or TI (test N3 (uptake or access*)) or AB (test N3 (uptake or access*)) | 16,648  |
| S50 | (MH "Referral and Consultation+")                                                                                                                                                                             | 33,898  |
| S51 | (MH "Diffusion of Innovation")                                                                                                                                                                                | 11,773  |
| S52 | (MH "Health Care Delivery, Integrated")                                                                                                                                                                       | 8941    |
| S53 | TI (scal* up or referral*) or AB (scal* up or referral*)                                                                                                                                                      | 41,194  |
| S54 | S1 OR S2 OR S3 OR S4 OR S5 OR S6 OR S7 OR S8 OR S9 OR S10 OR S11 OR S12 OR S13 OR S14 OR S15 OR S16 OR S17 OR S18 OR S19 OR S20 OR S21 OR S22 OR S23 OR S24 OR S25 OR S26 OR S27 OR S28 OR S29 OR S30 OR S31  | 19,391  |
| S55 | S32 OR S33 OR S34 OR S35 OR S36                                                                                                                                                                               | 152,600 |
| S56 | S37 OR S38 OR S39 OR S40 OR S41 OR S42 OR S43 OR S44 OR S45 OR S46 OR S47 OR S48 OR S49 OR S50 OR S51 OR S52 OR S53                                                                                           | 671,204 |
| S57 | S54 AND S55 AND S56                                                                                                                                                                                           | 439     |
| S58 | S54 AND S55 AND S56<br><br>Limiters - English Language; Published Date: 19800101-20181031                                                                                                                     | 439     |

\*An alert was set up for both searches outlined in Table 1 and 2 with 910 alerts included for the final 2915 records identified through database searching
