# Supplementary material for: Health system interventions to integrate genetic testing in routine oncology services: A systematic review
Source: PubMed Central journal article supplement (PMC8133413; doi:10.1371/journal.pone.0250379), 2021-05-19
Supplement: pone.0250379.s006.pdf [file pone.0250379.s006.pdf]

**S6 Table. Assessment of risk of bias of included case series**

| Domain - Potential source of bias                                                | Plascokinska 2016 <sup>31</sup> | George 2016 <sup>29</sup> | Percival 2016 <sup>30</sup> | Rahman 2017 <sup>32</sup> | Bednar 2017 <sup>35</sup> | Brown 2018 <sup>38</sup> | Miesfeldt 2018 <sup>41</sup> | Kemp 2019 <sup>40</sup> | Bednar 2019 <sup>39</sup> | Tutty 2019 <sup>48</sup> | Grinedal 2020 <sup>53</sup> | McLeavy 2020 <sup>51</sup> | Rumford 2020 <sup>52</sup> | Kentwell 2017 <sup>33</sup> |
|----------------------------------------------------------------------------------|---------------------------------|---------------------------|-----------------------------|---------------------------|---------------------------|--------------------------|------------------------------|-------------------------|---------------------------|--------------------------|-----------------------------|----------------------------|----------------------------|-----------------------------|
| Representative of all health system workers or patients impacted by intervention | Low                             | High                      | High                        | High                      | High                      | Low                      | High                         | High                    | High                      | High                     | Low                         | High                       | High                       | High                        |
| Ascertainment of outcome                                                         | Moderate                        | High                      | High                        | High                      | High                      | Moderate                 | High                         | High                    | High                      | High                     | High                        | High                       | High                       | High                        |
| Anonymously completed questionnaire /survey                                      | NA                              | Moderate                  | Moderate                    | NA                        | NA                        | NA                       | NA                           | Moderate                | NA                        | High                     | NA                          | High                       | NA                         | High                        |
| Was follow up of patients long enough for outcomes to occur                      | Low                             | Low                       | Low                         | Moderate                  | Low                       | Low                      | Low                          | Low                     | Low                       | Low                      | Low                         | Low                        | Low                        | Low                         |
| Adequacy of follow up of patients                                                | High                            | Low                       | Low                         | High                      | Low                       | High                     | Low                          | High                    | Low                       | High                     | High                        | High                       | Low                        | Low                         |
| <b>Overall Risk of bias</b>                                                      | <b>High</b>                     | <b>High</b>               | <b>High</b>                 | <b>High</b>               | <b>High</b>               | <b>High</b>              | <b>High</b>                  | <b>High</b>             | <b>High</b>               | <b>High</b>              | <b>High</b>                 | <b>High</b>                | <b>High</b>                | <b>High</b>                 |

Key to overall rating: High risk of bias – high risk of bias in any domain, Moderate risk of bias – moderate or low risk of bias in all domains, no high risk domains, Low risk of bias – all domains low risk of bias, no moderate or high risk domains, NA = not applicable
