# Supplementary material for: Health system interventions to integrate genetic testing in routine oncology services: A systematic review
Source: PLoS One. 2021 May 19;16(5):e0250379. doi: 10.1371/journal.pone.0250379 (PMC8133413; doi:10.1371/journal.pone.0250379)
Supplement: S5 Table — (PDF) [file pone.0250379.s005.pdf]

**S5 Table. Assessment of risk of bias of included cohort studies**

[illegible]
